# Supplementary material for: T Cell Reactivity to Regulatory Factor X4 in Type 1 Narcolepsy
Source: Research Square preprint supplement (doi:10.21203/rs.3.rs-154017/v1), 2021-02-01
Supplement: Supplementary file 1 [file 19757a7285ac1d49315620a8.docx]

**Table I**. RFX4 peptides for tetramer DQ0602

| **Peptide** | **Position** | **Sequence** | **Specific or Shared** | **Affinity** | **% EBV** |
| --- | --- | --- | --- | --- | --- |
| RFX4-2 | v1 5->19 | AFGGSEFFIPEGIQI | v1 | SB | 12.66 |
| RFX4-3 | v1 9->23 | SEFFIPEGIQIDSRC | v1 | SB | 16.8 |
| RFX4-9 | v1 33->47 | YHYYGIAVKESSQYY | v1, v2, v3, v4 | SB | 22.65 |
| RFX4-22 | v1 85->99 | PEFPNVKDLNLPASL | v1, v2, v3, v4 | SB | 23.39 |
| RFX4-23 | v1 89->103 | NVKDLNLPASLPEEK | v1, v2, v3, v4 | SB | 15.16 |
| RFX4-25 | v1 97->111 | ASLPEEKVSTFIMMY | v1, v2, v3, v4 | SB | 8.54 |
| RFX4-26 | v1 101->115 | EEKVSTFIMMYRTHC | v1, v2, v3, v4 | SB | 18.89 |
| RFX4-29 | v1 113->127 | THCQRILDTVIRANF | v1, v2, v3, v4 | SB | 14.62 |
| RFX4-30 | v1 117->131 | RILDTVIRANFDEVQ | v1, v2, v3, v4 | SB | 10.27 |
| RFX4-36 | v1 141->155 | MPPHMLPVLGSSTVV | v1, v2, v3, v4 | WB | 25.86 |
| RFX4-41 | v1 161->175 | CDSILYKAISGVLMP | v1, v2, v3, v4 | SB | 22.74 |
| RFX4-42 | v1 165->179 | LYKAISGVLMPTVLQ | v1, v2, v3, v4 | SB | 10.33 |
| RFX4-43 | v1 169->183 | ISGVLMPTVLQALPD | v1, v2, v3, v4 | SB | 10.37 |
| RFX4-60 | v1 237->251 | QASRTVIHSADITFQ | v1, v2, v3, v4 | SB | 20.08 |
| RFX4-61 | v1 241->255 | TVIHSADITFQMLED | v1, v2, v3, v4 | WB | 25.27 |
| RFX4-72 | v1 285->299 | QLYQEFDHLLEEQSP | v1, v2, v3, v4, v5, v6 | SB | 17.49 |
| RFX4-73 | v1 289->303 | EFDHLLEEQSPIESY | v1, v2, v3, v4, v5, v6 | SB | 23.54 |
| RFX4-76 | v1 301->315 | ESYIEWLDTMVDRCV | v1, v2, v3, v4, v5, v6 | SB | 12.95 |
| RFX4-82 | v1 325->339 | SLKKVAQQFLLMWSC | v1, v2, v3, v4, v5, v6 | SB | 23.25 |
| RFX4-86 | v1 341->355 | GTRVIRDMTLHSAPS | v1, v2, v3, v4, v5, v6 | SB | 7.05 |
| RFX4-87 | v1 345->359 | IRDMTLHSAPSFGSF | v1, v2, v3, v4, v5, v6 | SB | 16.9 |
| RFX4-89 | v1 353->367 | APSFGSFHLIHLMFD | v1, v2, v3, v4, v5, v6 | SB | 19.61 |
| RFX4-95 | v1 377->391 | LHCQERANELMRAMK | v1, v2, v3, v4, v5, v6 | SB | 12.26 |
| RFX4-96 | v1 381->395 | ERANELMRAMKGEGS | v1, v2, v3, v4, v5, v6 | SB | 17.04 |
| RFX4-98 | v1 389->403 | AMKGEGSTAEVREEI | v1, v2, v3, v4, v5, v6 | WB | 25.87 |
| RFX4-100 | v1 397->411 | AEVREEIILTEAAAP | v1, v2, v3, v4, v5, v6 | SB | 14.93 |
| RFX4-101 | v1 401->415 | EEIILTEAAAPTPSP | v1, v2, v3, v4, v5, v6 | SB | 19.99 |
| RFX4-105 | v1 417->431 | PSFSPAKSATSVEVP | v1, v2, v3, v4, v5, v6 | WB | 25.99 |
| RFX4-112 | v1 445->459 | TGLSTTGAMQSYTWS | v1, v3 | WB | 26.43 |
| RFX4-115 | v1 457->471 | TWSLTYTVTTAAGSP | v1, v3, v4, v5, v6 | SB | 17.75 |
| RFX4-158 | v1 629->641 | AYINGEASTGWAK | v1, v3, v4, v5, v6 | SB | 20.21 |
| RFX4-171 | v3 53->67 | SKPHSTPATLQWLEE | v2, v3, v4 | SB | 8.41 |
| RFX4-172 | v3 57->71 | STPATLQWLEENYEI | v2, v3, v4 | SB | 18.78 |
| RFX4-173 | v3 61->75 | TLQWLEENYEIAEGV | v2, v3, v4 | WB | 25.64 |
| RFX4-175 | v3 69->83 | YEIAEGVCIPRSALY | v2, v3, v4 | SB | 23.99 |
| RFX4-189 | v3 125->139 | SKYHYYGIAVKESSQ | v2, v3, v4 | SB | 16.99 |
| RFX4-190 | v3 129->143 | YYGIAVKESSQYYDV | v1, v2, v3, v4 | SB | 22.69 |
| RFX4-202 | v4 548->562 | TGLSTTGAMQAYTWS | v4, v5, v6 | SB | 9.32 |

SB, strong binder; WB, weak binder.
