# Supplementary material for: T Cell Reactivity to Regulatory Factor X4 in Type 1 Narcolepsy
Source: Research Square preprint supplement (doi:10.21203/rs.3.rs-154017/v1), 2021-02-01
Supplement: Supplementary file 2 [file 70d3647ca0cb1eb5227a56b0.docx]

**Table II**. Enriched TCRαβ from RFX4 antigen specific CD4+CD8- T cells

| **D** | **P** | **Dx** | **BV** | **CDR3β** | **BJ** | **AV** | **CDR3α** | **AJ** | **C#** | **TCR** | **Note** |
| --- | --- | --- | --- | --- | --- | --- | --- | --- | --- | --- | --- |
| 900 | 95 | P | 28 | CASSSSGQGGNSPLHF | 1-6 | 19 | CALSGDVYGGSQGNLIF | 42 | 74 | 162 |  |
| 21 | 86 | P | 12-3 | CASSLRGLNYGYTF | 1-2 | 41 | CAVLNRDDKIIF | 30 | 66 | 163 |  |
| 948 | 86 | P | 4-2 | CASSQEGGKETQYF | 2-5 | 2 | CAGPSGYSTLTF | 11 | 52 | 164 | NE |
| 6 | CALDRGTDKLIF* | 34 | 49 | 165 |  |
|  |  |  |  |  |  |  |  |  |  |  |  |
| 21 | 95 | P | 2 | CASSGQGSYEQYF | 2-7 | 9-2 | CALSSLWGEKLTF | 48 | 32 | 166 |  |
| 12-1 | CVVNMNFGGGADGLTF* | 45 | 32 | 167 | NE |
| 901 | 86 | C | 5-6 | CASSRGRVGESSYEQYF | 2-7 | 12-1 | CVVNIENAGNMLTF | 39 | 28 | 168 | NE |
| 21 | 95 | P | 28 | CASSFSGTRTGELFF | 2-2 | 3 | CAPGRGSSNTGKLIF | 37 | 26 | 169 | NE |
| 12-2 | CAVMPNDYKLSF* | 20 | 26 | 170 |  |
| 5688 | 86 | C | 4-2 | CASSNNYGYTF | 1-2 | 38-2/DV8 | CARPANSGNTPLVF | 29 | 23 | 171 | NE |
| 21 | 86 | P | 5-6 | CASSLGPRTPKGQYF | 2-7 | 39 | CAVENNNDMRF | 43 | 20 | 172 |  |
| 5688 | 86 | C | 4-2 | CASSQDVRQGGYGYTF | 1-2 | 29/DV5 | CAASDQAGTALIF | 15 | 9 | 173 |  |
| 848 | 60 | P | 14 | CASSLQGRRGDTQYF | 2-3 | 29/DV5 | CAASAGAGSYQLTF | 28 | 7 | 174 |  |

D, donor; P, peptide; Dx, diagnosis; C, control; P, patient; C#, cell count. *, alternative CDR3α. NE, not expressed.
